# Supplementary material for: A Bayesian Network Meta-Analysis of First-Line Treatments for Non-Small Cell Lung Cancer with High Programmed Death Ligand-1 Expression
Source: MDPI journal article supplement (doi:10.3390/jcm11061492), 2022-03-09
Supplement: s1 [file s1]

(A)

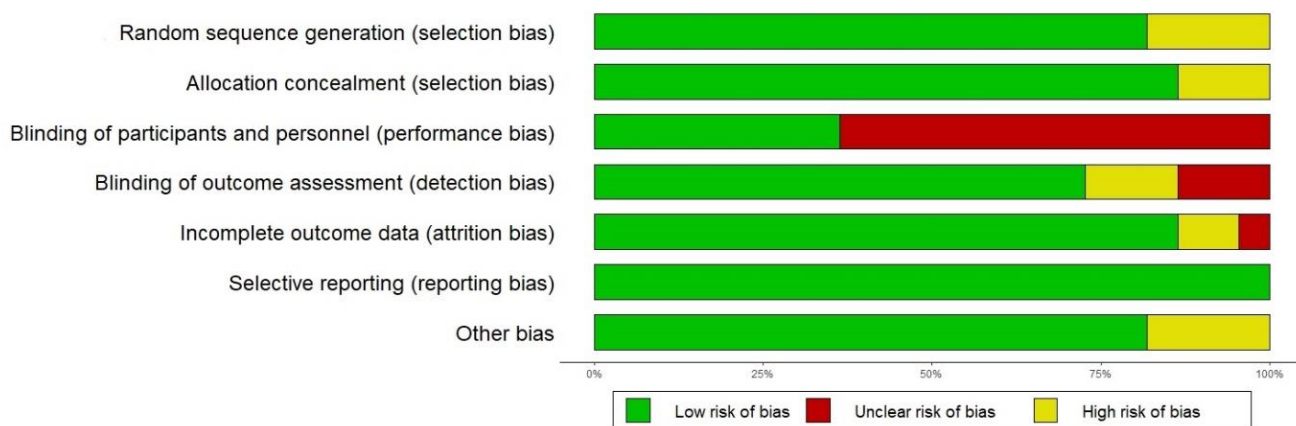

(B)

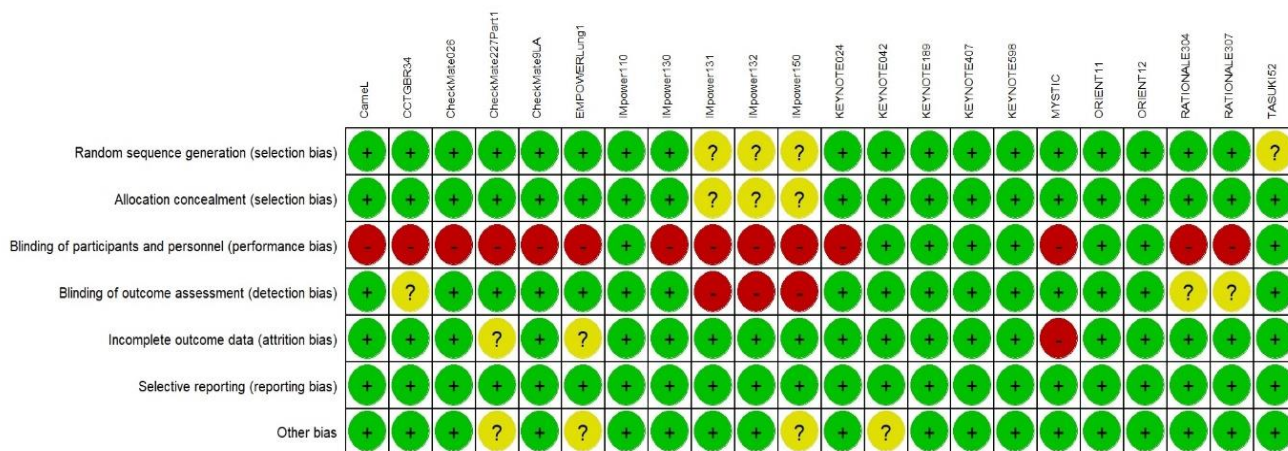

**Figure S1.** Graphic (A) and tabular representation (B) of risk of bias in all studies included.

(A)

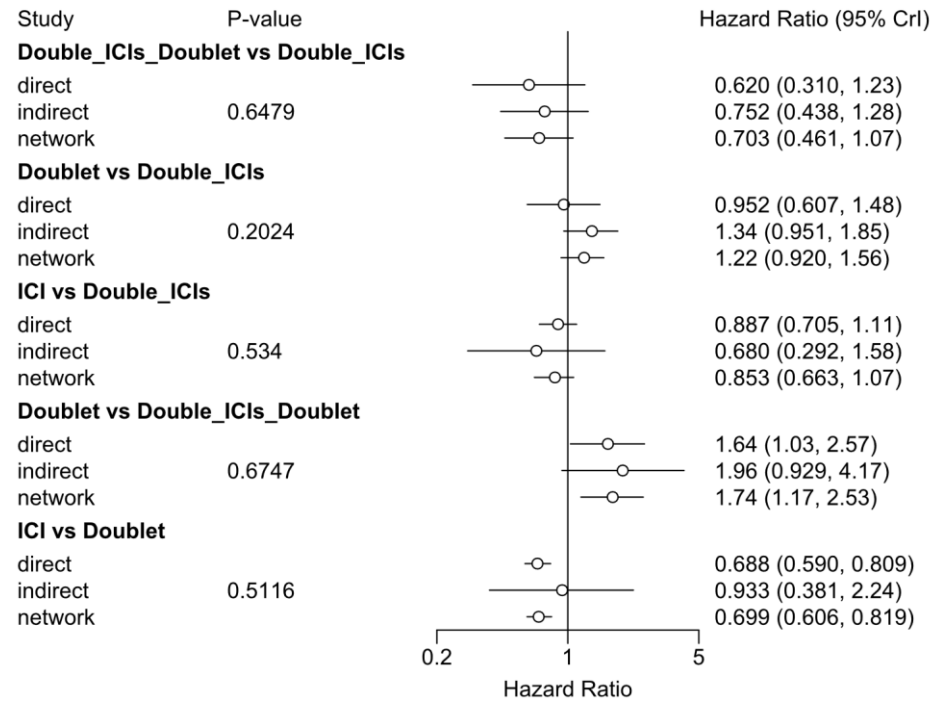

(B)

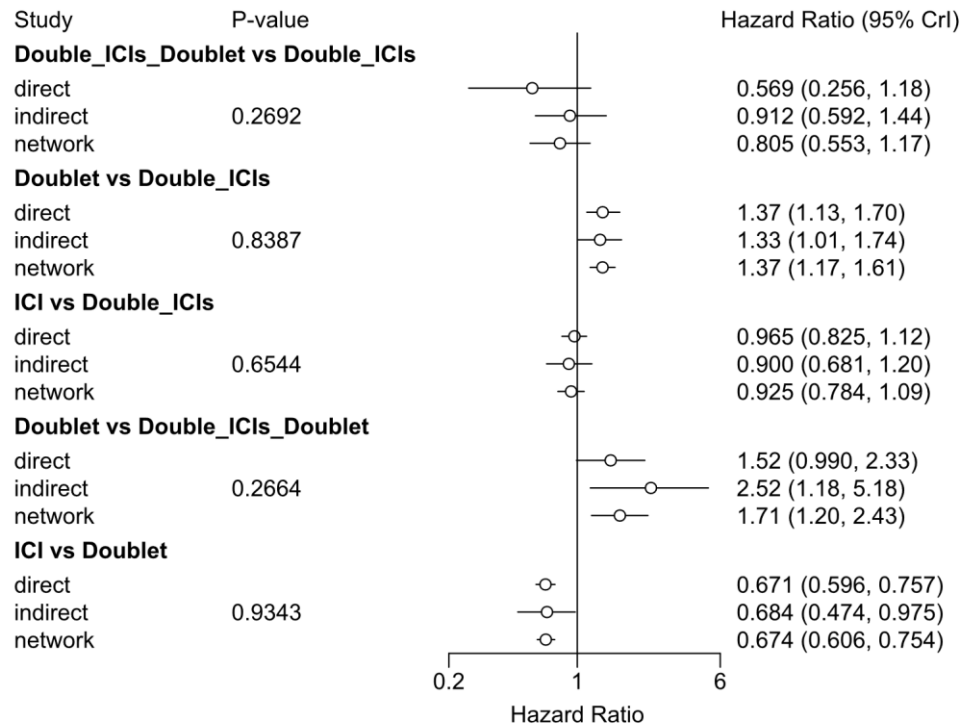

Figure S2. Node splitting analysis for PFS (A) and OS (B).

**Table S1.** Detailed characteristics of the 22 studies included in the Bayesian network meta-analysis.

| Study [ref]                  | Trial Design              | Mutations                          | PD-L1 Criteria | PD-L1 Detection | Intervention Arm                                                                                                                                                                               | Control Arm                                                                                                                                                                                                                                                        |
|------------------------------|---------------------------|------------------------------------|----------------|-----------------|------------------------------------------------------------------------------------------------------------------------------------------------------------------------------------------------|--------------------------------------------------------------------------------------------------------------------------------------------------------------------------------------------------------------------------------------------------------------------|
| <b>KEYNOTE-024</b><br>[13]   | Phase III<br>Open-label   | Without EGFR or<br>ALK alterations | $\geq 50\%$    | 22C3<br>pharmDx | Pembrolizumab 200mg Q3W                                                                                                                                                                        | Pemetrexed 500mg/m <sup>2</sup> + Carboplatin<br>AUC5~6 or Cisplatin 75mg/m <sup>2</sup> Q3W<br>Gemcitabine 1250mg/m <sup>2</sup> D1,8 + Carboplatin<br>AUC5~6 or Cisplatin 75mg/m <sup>2</sup> Q3W<br>Paclitaxel 200mg/m <sup>2</sup> + Carboplatin AUC5~6<br>Q3W |
| <b>KEYNOTE-042</b><br>[15]   | Phase III<br>Open-label   | Without EGFR or<br>ALK alterations | $\geq 1\%$     | 22C3<br>pharmDx | Pembrolizumab 200mg Q3W                                                                                                                                                                        | Pemetrexed 500mg/m <sup>2</sup> + Carboplatin<br>AUC5~6 Q3W<br>Paclitaxel 200mg/m <sup>2</sup> + Carboplatin AUC5~6<br>Q3W                                                                                                                                         |
| <b>KEYNOTE-189</b><br>[29]   | Phase III<br>Double-blind | Without EGFR or<br>ALK alterations | All comers     | 22C3<br>pharmDx | Pembrolizumab 200mg Q3W + Pemetrexed<br>500mg/m <sup>2</sup> + Carboplatin AUC5 or Cisplatin 75mg/m <sup>2</sup><br>Q3W                                                                        | Pemetrexed 500mg/m <sup>2</sup> + Carboplatin AUC5<br>or Cisplatin 75mg/m <sup>2</sup> Q3W                                                                                                                                                                         |
| <b>KEYNOTE-407</b><br>[16]   | Phase III<br>Double-blind | Unselected                         | All comers     | 22C3<br>pharmDx | Pembrolizumab 200mg Q3W + Paclitaxel 200mg/m <sup>2</sup> +<br>Carboplatin AUC6 Q3W                                                                                                            | Paclitaxel 200mg/m <sup>2</sup> + Carboplatin AUC6<br>Q3W                                                                                                                                                                                                          |
| <b>KEYNOTE-598</b><br>[43]   | Phase III<br>Double-blind | Without EGFR or<br>ALK alterations | $\geq 50\%$    | 22C3<br>pharmDx | Pembrolizumab 200mg Q3W + ipilimumab 1mg/kg<br>Q6W                                                                                                                                             | Pembrolizumab 200mg Q3W                                                                                                                                                                                                                                            |
| <b>IMpower110</b><br>[21]    | Phase III<br>Open-label   | Without EGFR or<br>ALK alterations | $\geq 1\%$     | SP142           | Atezolizumab 1200mg Q3W                                                                                                                                                                        | Pemetrexed 500mg/m <sup>2</sup> + Carboplatin AUC6<br>or Cisplatin 75mg/m <sup>2</sup> Q3W<br>Gemcitabine 1000mg/m <sup>2</sup> D1,8 + Carboplatin<br>AUC5 Q3W<br>Gemcitabine 1250mg/m <sup>2</sup> D1,8 + Cisplatin<br>75mg/m <sup>2</sup> Q3W                    |
| <b>IMpower130</b><br>[19]    | Phase III<br>Open-label   | Without EGFR or<br>ALK alterations | All comers     | SP142           | Atezolizumab 1200mg + nab-Paclitaxel 100mg/m <sup>2</sup> +<br>Carboplatin AUC6 Q3W                                                                                                            | nab-Paclitaxel 100mg/m <sup>2</sup> + Carboplatin<br>AUC6 Q3W                                                                                                                                                                                                      |
| <b>IMpower131</b><br>[20]    | Phase III<br>Open-label   | Unselected                         | All comers     | SP142           | Atezolizumab 1200mg + nab-Paclitaxel 100mg/m <sup>2</sup> +<br>Carboplatin AUC6 Q3W                                                                                                            | nab-Paclitaxel 100mg/m <sup>2</sup> + Carboplatin<br>AUC6 Q3W                                                                                                                                                                                                      |
| <b>IMpower132</b><br>[22]    | Phase III<br>Open-label   | Without EGFR or<br>ALK alterations | All comers     | SP142           | Atezolizumab 1200mg + Pemetrexed 500mg/m <sup>2</sup> +<br>Carboplatin AUC6 or Cisplatin 75mg/m <sup>2</sup> Q3W                                                                               | Pemetrexed 500mg/m <sup>2</sup> + Carboplatin AUC6<br>or Cisplatin 75mg/m <sup>2</sup> Q3W                                                                                                                                                                         |
| <b>IMpower150</b><br>[30]    | Phase III<br>Open-label   | Without EGFR or<br>ALK alterations | All comers     | SP142           | 1. Atezolizumab 1200mg + Bevacizumab 15mg/kg +<br>Paclitaxel 200mg/m <sup>2</sup> + Carboplatin AUC6 Q3W<br>2. Atezolizumab 1200mg + Paclitaxel 200mg/m <sup>2</sup> +<br>Carboplatin AUC6 Q3W | Bevacizumab 15mg/kg + Paclitaxel<br>200mg/m <sup>2</sup> + Carboplatin AUC6 Q3W                                                                                                                                                                                    |
| <b>CheckMate 026</b><br>[17] | Phase III<br>Open-label   | Without EGFR or<br>ALK alterations | $\geq 1\%$     | 28-8<br>PharmDx | Nivolumab 3mg/kg Q2W                                                                                                                                                                           | Gemcitabine 1250mg/m <sup>2</sup> D1,8 + Cisplatin<br>75mg/m <sup>2</sup> Q3W                                                                                                                                                                                      |

|                                 |                           |                                    |            |                 |                                                                                                                                                                |                                                                                                                                                                                                                                                                                            |
|---------------------------------|---------------------------|------------------------------------|------------|-----------------|----------------------------------------------------------------------------------------------------------------------------------------------------------------|--------------------------------------------------------------------------------------------------------------------------------------------------------------------------------------------------------------------------------------------------------------------------------------------|
|                                 |                           |                                    |            |                 |                                                                                                                                                                | Gemcitabine 1000mg/m <sup>2</sup> D1,8 + Carboplatin AUC5 Q3W<br>Paclitaxel 200mg/m <sup>2</sup> + Carboplatin AUC6 Q3W<br>Pemetrexed 500mg/m <sup>2</sup> + Carboplatin AUC6 or Cisplatin 75mg/m <sup>2</sup> Q3W                                                                         |
| <b>CheckMate 9LA</b><br>[26]    | Phase III<br>Open-label   | Without EGFR or<br>ALK alterations | All comers | 28-8<br>PharmDx | Nivolumab 350mg Q3W + Ipilimumab 1mg/kg Q6W + Pemetrexed 500mg/m <sup>2</sup> + Carboplatin AUC6 or Cisplatin 75mg/m <sup>2</sup> Q3W                          | Pemetrexed 500mg/m <sup>2</sup> + Carboplatin AUC6 or Cisplatin 75mg/m <sup>2</sup> Q3W                                                                                                                                                                                                    |
| <b>CheckMate 227</b><br>[25,41] | Phase III<br>Open-label   | Without EGFR or<br>ALK alterations | All comers | 28-8<br>PharmDx | 1. Nivolumab 3mg/kg Q2W + Ipilimumab 1mg/kg Q6W<br>2. Nivolumab 240mg Q2W                                                                                      | Pemetrexed 500mg/m <sup>2</sup> + Carboplatin AUC6 or Cisplatin 75mg/m <sup>2</sup> Q3W<br>Gemcitabine 1250mg/m <sup>2</sup> D1,8 + Cisplatin 75mg/m <sup>2</sup> Q3W<br>Gemcitabine 1000mg/m <sup>2</sup> D1,8 + Carboplatin AUC5 Q3W                                                     |
| <b>MYSTIC</b><br>[27]           | Phase III<br>Open-label   | Without EGFR or<br>ALK alterations | All comers | SP263           | 1. Durvalumab 20mg/kg + Tremelimumab 1mg/kg Q4W<br>2. Durvalumab 20mg/kg Q4W                                                                                   | Pemetrexed 500mg/m <sup>2</sup> + Carboplatin AUC6 or Cisplatin 75mg/m <sup>2</sup> Q3W                                                                                                                                                                                                    |
| <b>CameL</b><br>[23]            | Phase III<br>Open-label   | Without EGFR or<br>ALK alterations | All comers | 22C3<br>pharmDx | Camrelizumab 200mg + Pemetrexed 500mg/m <sup>2</sup> + Carboplatin AUC5 Q3W                                                                                    | Pemetrexed 500mg/m <sup>2</sup> + Carboplatin AUC5 Q3W                                                                                                                                                                                                                                     |
| <b>CCTG BR 34</b><br>[42]       | Phase II<br>Open-label    | Without EGFR or<br>ALK alterations | All comers | SP263           | Durvalumab 1500mg Q4W + Tremelimumab 75mg Q4W + Pemetrexed 500mg/m <sup>2</sup> + Carboplatin AUC6 or Cisplatin 75mg/m <sup>2</sup> Q3W                        | Durvalumab 1500mg + Tremelimumab 75mg Q4W                                                                                                                                                                                                                                                  |
| <b>RATIONALE 304</b><br>[33]    | Phase III<br>Open-label   | Without EGFR or<br>ALK alterations | All comers | SP263           | Tislelizumab 200mg + Pemetrexed 500mg/m <sup>2</sup> + Carboplatin AUC5 or Cisplatin 75mg/m <sup>2</sup> Q3W                                                   | Pemetrexed 500mg/m <sup>2</sup> + Carboplatin AUC5 or Cisplatin 75mg/m <sup>2</sup> Q3W                                                                                                                                                                                                    |
| <b>RATIONALE 307</b><br>[32]    | Phase III<br>Open-label   | Without EGFR or<br>ALK alterations | All comers | SP263           | Tislelizumab 200mg + Paclitaxel 200mg/m <sup>2</sup> + Carboplatin AUC5 Q3W<br>Tislelizumab 200mg + nab-Paclitaxel 100mg/m <sup>2</sup> + Carboplatin AUC5 Q3W | Paclitaxel 200mg/m <sup>2</sup> + Carboplatin AUC5 Q3W                                                                                                                                                                                                                                     |
| <b>ORIENT-11</b><br>[31]        | Phase III<br>Double-blind | Without EGFR or<br>ALK alterations | All comers | 22C3<br>pharmDx | Sintilimab 200mg + Paclitaxel 200mg/m <sup>2</sup> + Carboplatin AUC5 or Cisplatin 75mg/m <sup>2</sup> Q3W                                                     | Paclitaxel 200mg/m <sup>2</sup> + Carboplatin AUC5 or Cisplatin 75mg/m <sup>2</sup> Q3W                                                                                                                                                                                                    |
| <b>ORIENT-12</b><br>[34]        | Phase III<br>Double-blind | Without EGFR or<br>ALK alterations | All comers | 22C3<br>pharmDx | Sintilimab 200mg + Gemcitabine 1000mg/m <sup>2</sup> D1,8 + Carboplatin AUC5 or Cisplatin 75mg/m <sup>2</sup> Q3W                                              | Gemcitabine 1000mg/m <sup>2</sup> D1,8 + Carboplatin AUC5 or Cisplatin 75mg/m <sup>2</sup> Q3W                                                                                                                                                                                             |
| <b>EMPOWER-Lung 1</b><br>[24]   | Phase III<br>Open-label   | Without EGFR or<br>ALK alterations | ≥ 50 %     | 22C3<br>pharmDx | Cemiplimab 350mg Q3W                                                                                                                                           | Pemetrexed 500mg/m <sup>2</sup> + Carboplatin AUC5~6 or Cisplatin 75mg/m <sup>2</sup> Q3W + Paclitaxel 200mg/m <sup>2</sup> + Carboplatin AUC5~6 or Cisplatin 75mg/m <sup>2</sup> Q3W<br>Gemcitabine 1250mg/m <sup>2</sup> D1,8 + Carboplatin AUC5~6 or Cisplatin 100mg/m <sup>2</sup> Q3W |

|                   |                           |                                    |            |                 |                                                                                                   |                                                                                 |
|-------------------|---------------------------|------------------------------------|------------|-----------------|---------------------------------------------------------------------------------------------------|---------------------------------------------------------------------------------|
| TASUKI-52<br>[28] | Phase III<br>Double-blind | Without EGFR or<br>ALK alterations | All comers | 28-8<br>PharmDx | Nivolumab 360mg + Bevacizumab 15mg/kg +<br>Paclitaxel 200mg/m <sup>2</sup> + Carboplatin AUC6 Q3W | Bevacizumab 15mg/kg + Paclitaxel<br>200mg/m <sup>2</sup> + Carboplatin AUC6 Q3W |
|-------------------|---------------------------|------------------------------------|------------|-----------------|---------------------------------------------------------------------------------------------------|---------------------------------------------------------------------------------|
